# Supplementary material
Source: Springer Nature journal article supplement (https://www.springermedizin.de/resource/supplementary/12936_2008_732_MOESM1_ESM.pdf/9548116)

Log number parasites

**A**

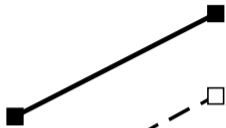

**Avir**

**Vir**

**B**

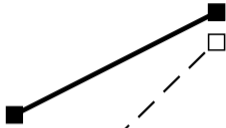

**Avir**

**Vir**

**C**

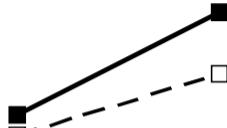

**Avir**

**Vir**

Supplement: MOESM1 [file 9548116]
